# Supplementary material
Source: PubMed Central journal article supplement (PMC2781462)
Supplement: supp_M109.018085_jbc.M109.018085-1.pdf [file supp_M109.018085_jbc.M109.018085-1.pdf]

## Supplemental Information

**Table S1. Data collection and refinement statistics**

|                                     | Crystal                          |                                  |
|-------------------------------------|----------------------------------|----------------------------------|
|                                     | L-HNP1                           | D-HNP1                           |
| <b>Data collection</b>              |                                  |                                  |
| Space group                         | P2 <sub>1</sub> 2 <sub>1</sub> 2 | P2 <sub>1</sub> 2 <sub>1</sub> 2 |
| Cell parameters, Å                  | a=45.47, b=31.34, c=40.21        | a=45.28 Å, b=31.10, c=40.28      |
| Molecules/a.u.                      | 2                                | 2                                |
| Resolution, Å                       | 50-1.56 (1.62-1.56)              | 50-1.56 (1.62-1.56)              |
| Number of reflections               |                                  |                                  |
| Total                               | 14,915                           | 15,401                           |
| Unique                              | 8,146                            | 8,427                            |
| R <sub>merge</sub> <sup>b</sup> , % | 7.0 (15.2)                       | 7.8 (18.4)                       |
| Completeness, %                     | 94.2 (85.9)                      | 98.2 (92.5)                      |
| Redundancy                          | 7.0 (6.9)                        | 6.6 (6.4)                        |
| I/σ, I                              | 16.0 (13.9)                      | 17.4 (10.8)                      |
| <b>Refinement Statistics</b>        |                                  |                                  |
| Resolution, Å                       | 30-1.56                          | 12-1.56                          |
| R <sup>c</sup> , %                  | 17.1                             | 18.9                             |
| R <sub>free</sub> <sup>d</sup> , %  | 19.5                             | 19.9                             |
| Number of atoms                     |                                  |                                  |
| Protein <sup>e</sup>                | 476                              | 479                              |
| Water                               | 61                               | 47                               |
| Ligand                              | 13                               | 3                                |
| Root mean square deviation          |                                  |                                  |
| Bond lengths, Å                     | 0.011                            | 0.006                            |
| Bond angles, °                      | 1.42                             | 1.79                             |

<sup>a</sup>All data (outer shell).

<sup>b</sup> $R_{\text{merge}} = \sum |I - \langle I \rangle| / \sum I$ , where  $I$  is the observed intensity and  $\langle I \rangle$  is the average intensity obtained from multiple observations of symmetry-related reflections after rejections

<sup>c</sup> $R = \sum \| |F_o| - |F_c| \| / \sum |F_o|$ , where  $F_o$  and  $F_c$  are the observed and calculated structure factors, respectively

<sup>d</sup> $R_{\text{free}}$  = defined by Brünger

<sup>e</sup>Numbers refer to non-H atoms. Differences result from different number of residues accommodating multiple conformations

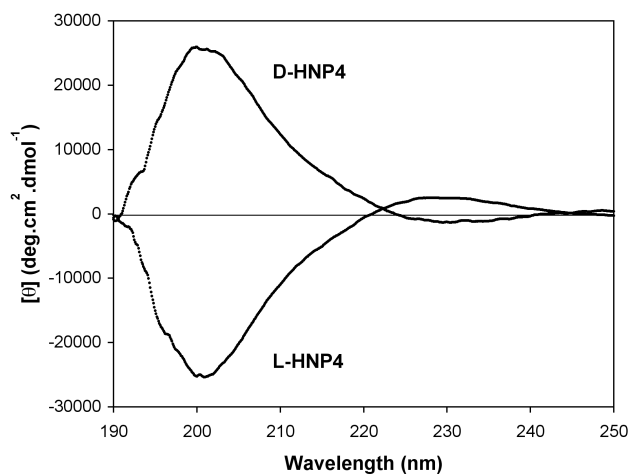

**Figure S1.** Circular dichroism spectra of <sup>L</sup>HNP4 and <sup>D</sup>HNP4 at 50  $\mu\text{M}$  in 5 mM phosphate buffer, pH 7.4. The spectra were acquired at room temperature using a 1-mm cuvette.

**Cytotoxicity of anthrax lethal toxin.** One day before the assay, RAW 264.7 (ATCC TIB-71) cells were seeded in a 96-well plate at a density of  $3 \times 10^4$  cells per well in RPMI medium 1640 supplemented with 5% FCS and appropriate amounts of antibiotics, and incubated in 5% CO<sub>2</sub> at 37 °C. 400 ng/ml lethal factor, 1600 ng/ml protective antigen and a two-fold dilution series of HNP1 (0, 1.25, 2.5, 5, 10, 20, 40, 80 μM), prepared in RPMI medium 1640 supplemented with 5% FCS, were added simultaneously to cells. Five hours after treatment, cell viability was determined using the MTS (3-(4,5-dimethylthiazol-2-yl)-5-(3-carboxymethoxyphenyl)-2-(4-sulfophenyl)-2H-tetrazolium) assay (Promega). Specifically, 100 μl of PMS solution was added to 2.0 ml of MTS solution. 20 μl of the combined MTS/PMS solution was added into each well of the 96 well assay plate containing 100 μl of cells in culture medium. The cells were further incubated for 1 hour, and the absorbance at 490 nm was recorded using an ELISA plate reader.

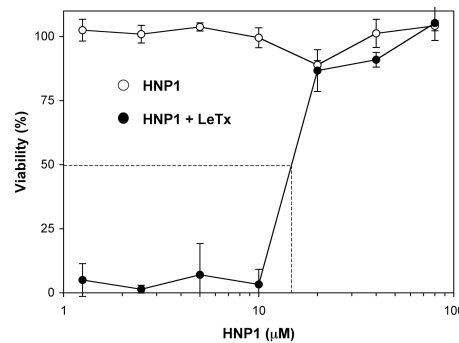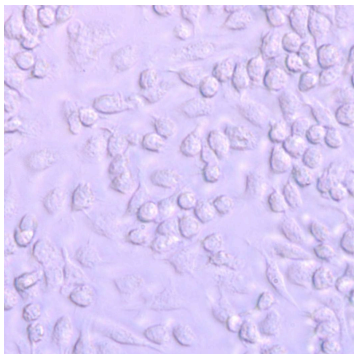

Control (20 μM HNP1)

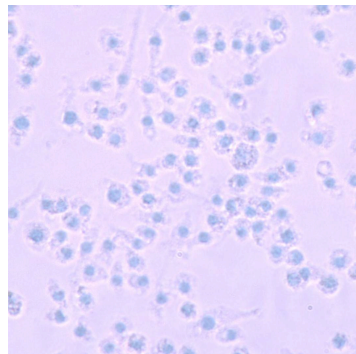

LeTx

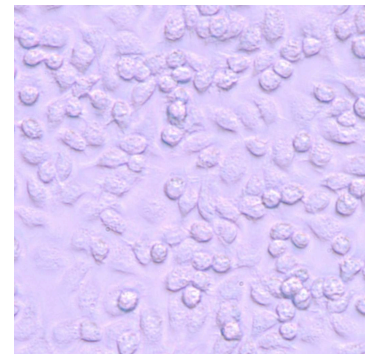

LeTx + 20 μM HNP1

**Figure S2.** Neutralization of anthrax lethal toxin (LeTx) by synthetic HNP1. Top panel: dose-dependent protection of macrophages against cytolysis by LeTx in RPMI medium 1640 supplemented with 5% FCS. Bottom panel: trypan blue cell staining experiments showing that 20 μM HNP1 fully protected macrophages from anthrax LeTx-induced cytolysis.
